# Supplementary material for: Sustained, local delivery of the PARP inhibitor talazoparib prevents the development of mammary gland hyperplasia in Brca1-deficient mice
Source: PubMed Central journal article supplement (PMC7806744; doi:10.1038/s41598-020-79663-7), 2021-01-13
Supplement: 41598_2020_79663_MOESM1_ESM.pdf [file 41598_2020_79663_MOESM1_ESM.pdf]

**Sustained, local delivery of the PARP inhibitor talazoparib prevents the development of mammary gland hyperplasia in *Brca1*-deficient mice**

Di Zhang<sup>1\*</sup>, Bijay Singh<sup>2,3\*</sup>, Jessica Moerland<sup>1</sup>, Owen Mitchell<sup>1</sup>, Lizbeth Lockwood<sup>1</sup>, Sarah Carapellucci<sup>1</sup>, Srinivas Sridhar<sup>2,3</sup>, Karen T. Liby<sup>1</sup>

**Authors' affiliations:** <sup>1</sup>Michigan State University, East Lansing, MI; <sup>2</sup>Theranano LLC, Newton, MA; <sup>3</sup>Northeastern University, Boston, MA.

\* These authors contributed equally to this work.

Exposure of  $\gamma$ H2AX and Vinculin

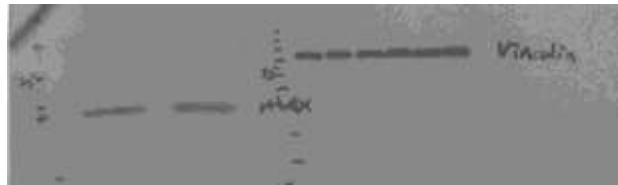

Longer exposure of  $\gamma$ H2AX

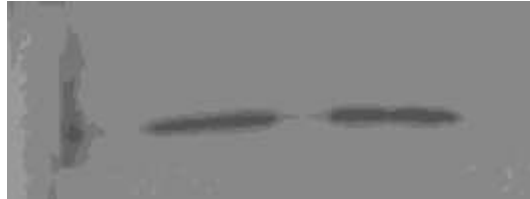

Shorter exposure of Vinculin

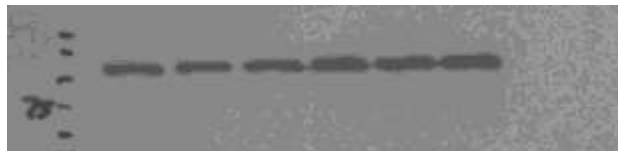

Exposure of c-caspase 3

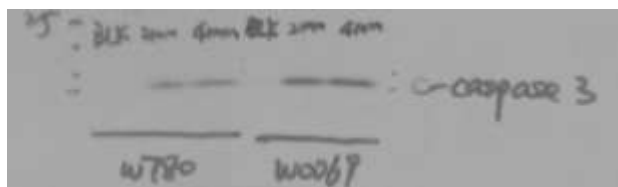

Exposure of PARP and cleaved-PARP

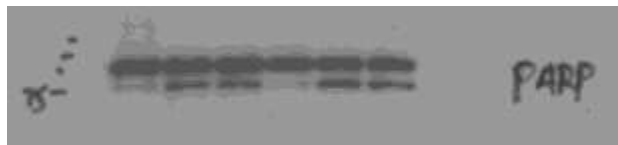

Exposure of Cyclin D1

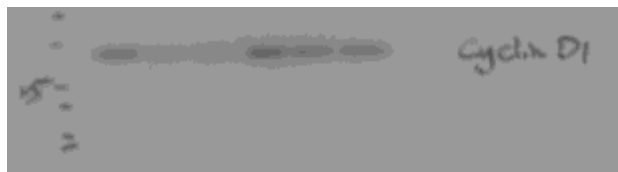

InCoY-22  
15 - 100 - 400 - 800 - 1600 - 3200  
- - - - - Caspase 3  
-----  
1700 1000

1000 - - - - - 1500

1000  
1500  
-----  
1700 1000

1000 - - - - - 1500

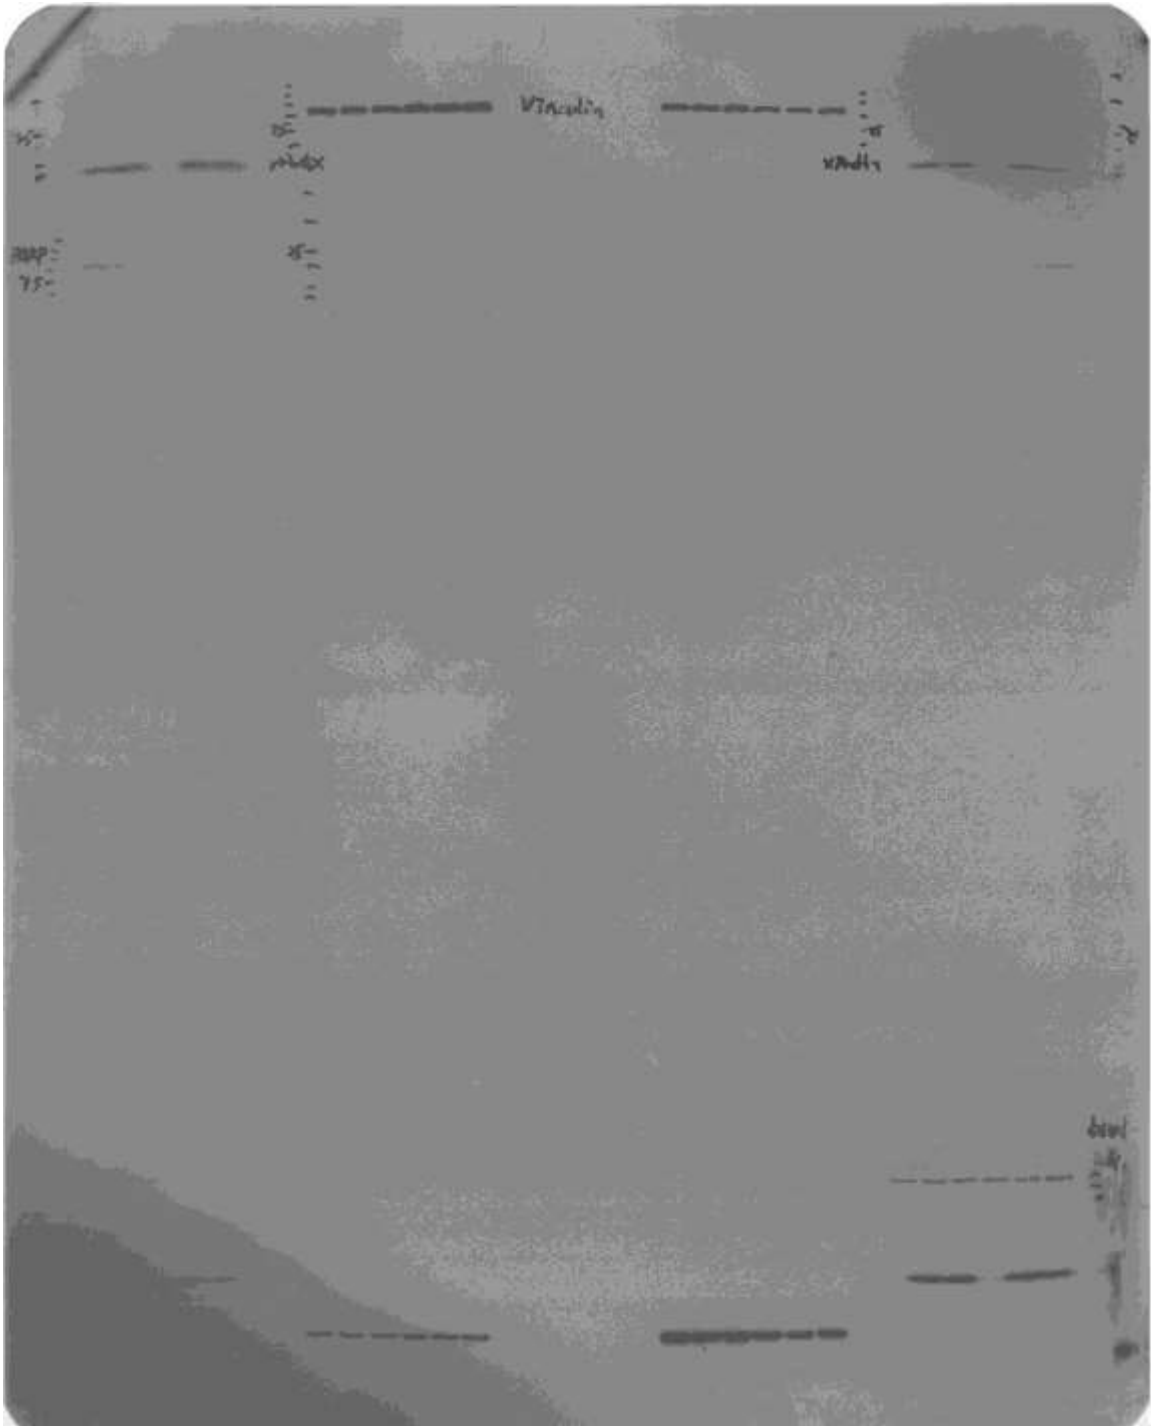

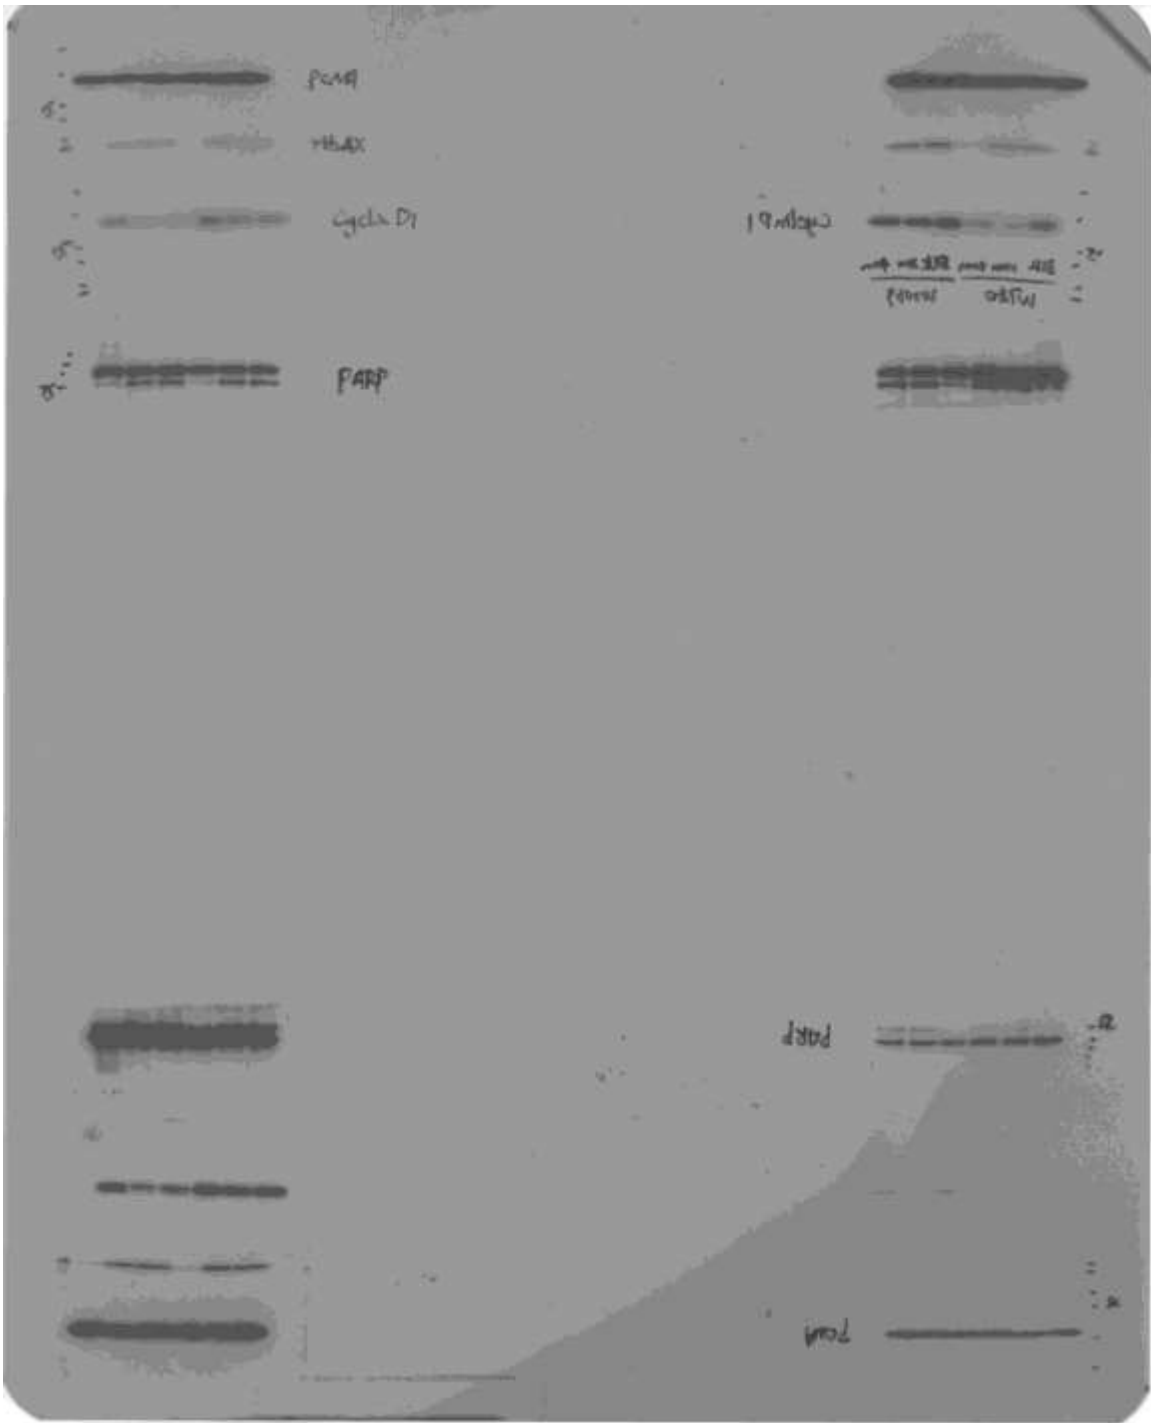

Suppl. Fig.1: Immunoblots used in Fig.2A.
